# Supplementary material for: Intervention with metabolites emulating endogenous cell transitions accelerates muscle regeneration in young and aged mice
Source: PubMed Central journal article supplement — Cell Rep Med. 2024 Mar 21;5(3):101449. doi: 10.1016/j.xcrm.2024.101449 (PMC10983034; doi:10.1016/j.xcrm.2024.101449), 2024-03-21
Supplement: mmc1.pdf [file mmc1.pdf]

**Supplemental information**

**Intervention with metabolites emulating  
endogenous cell transitions accelerates muscle regeneration in young  
and aged mice**

**Reyna Hernandez-Benitez, Chao Wang, Lei Shi, Yasuo Ouchi, Cuiqing Zhong, Tomoaki Hishida, Hsin-Kai Liao, Eric A. Magill, Sebastian Memczak, Rupa D. Soligalla, Chiara Fresia, Fumiyuki Hatanaka, Veronica Lamas, Isabel Guillen, Sanjeeb Sahu, Mako Yamamoto, Yanjiao Shao, Alain Aguirre-Vazquez, Estrella Nuñez Delicado, Pedro Guillen, Concepcion Rodriguez Esteban, Jing Qu, Pradeep Reddy, Steve Horvath, Guang-Hui Liu, Pierre Magistretti, and Juan Carlos Izpisua Belmonte**

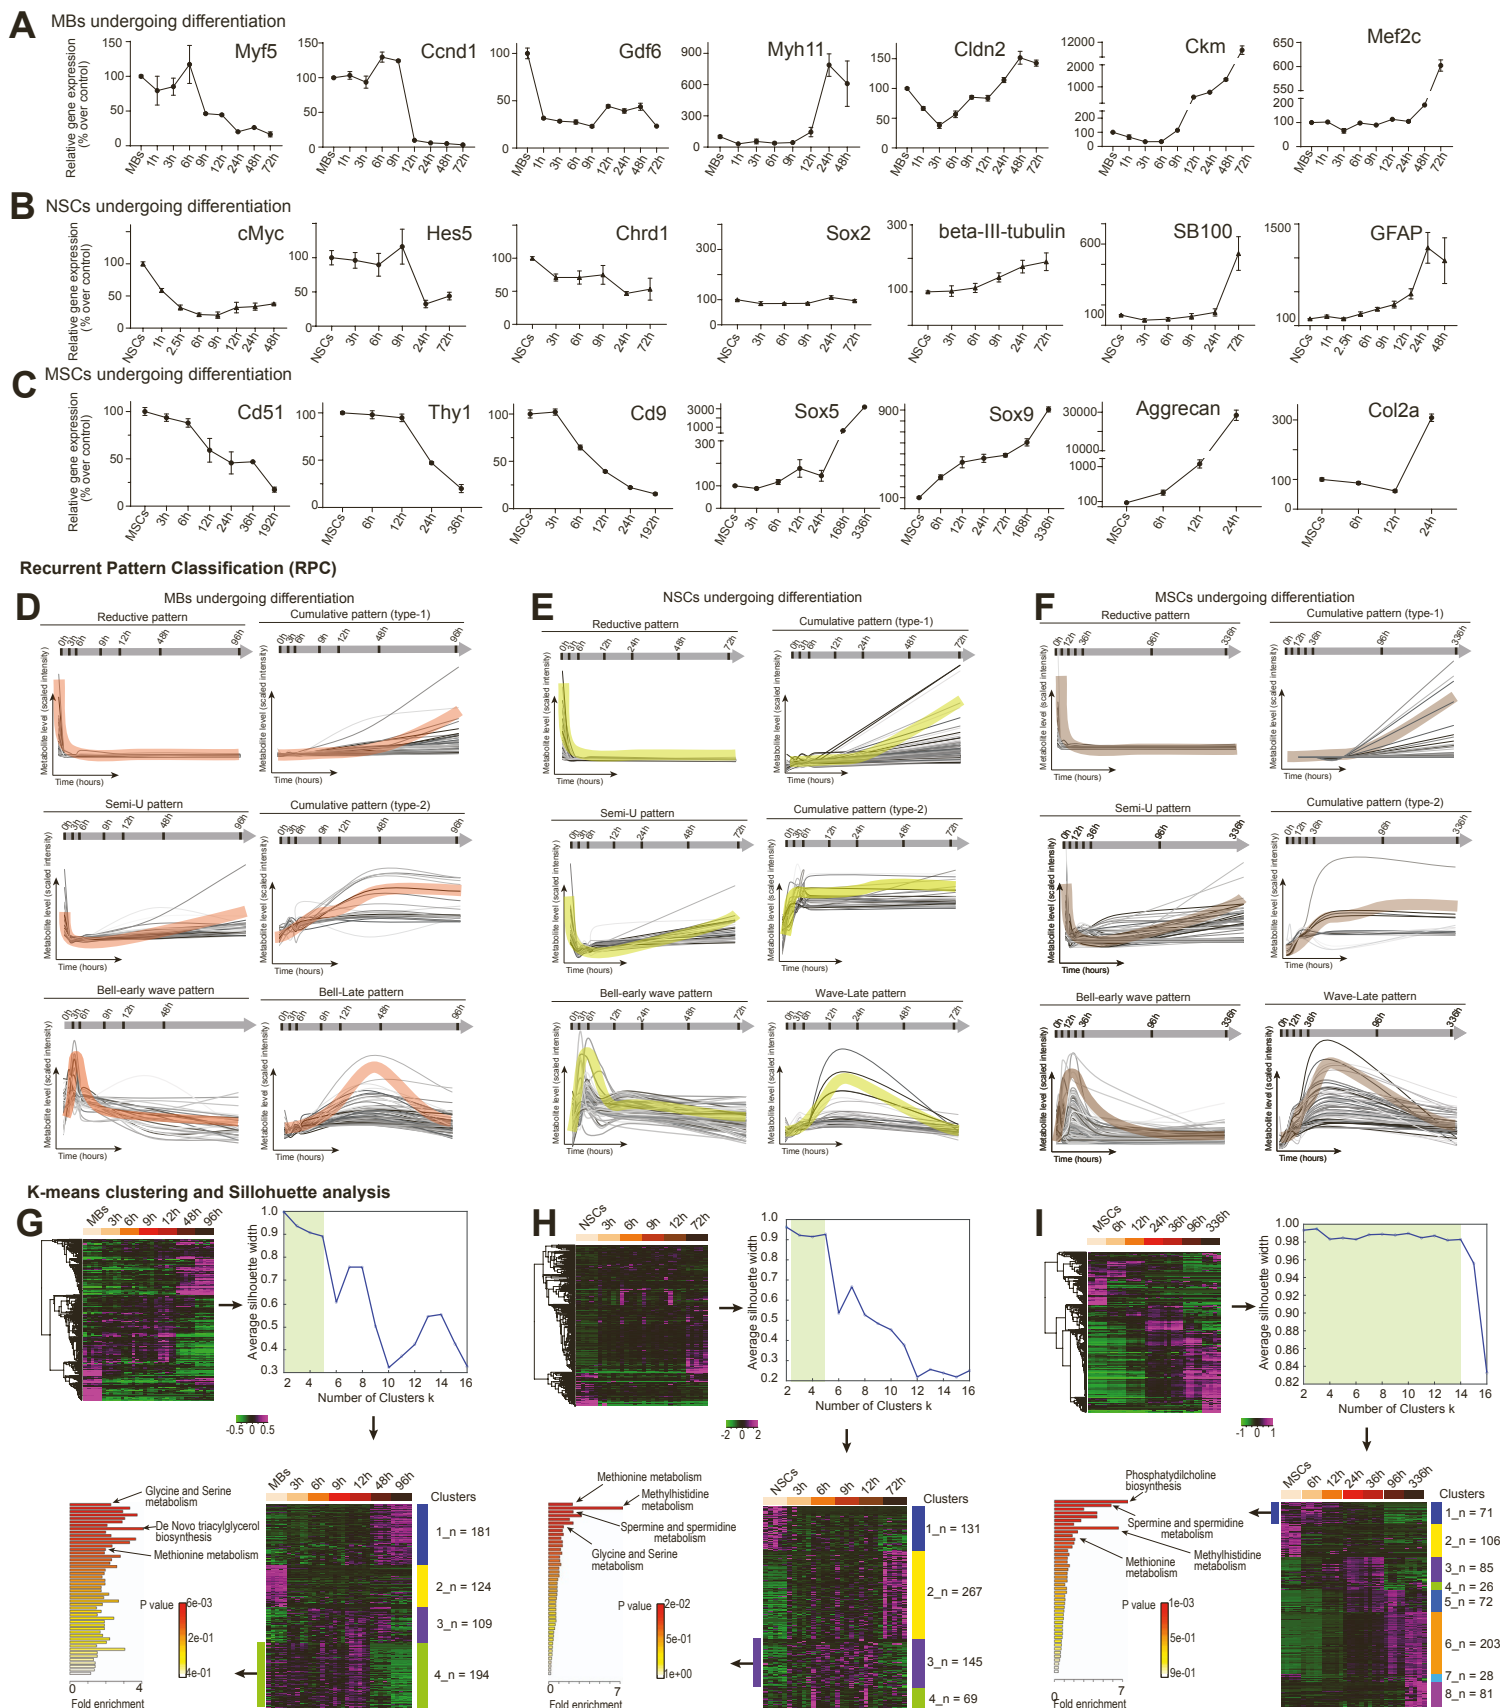

# A One-carbon metabolites detected in transitional phases of MBs, NSCs, and MSCs

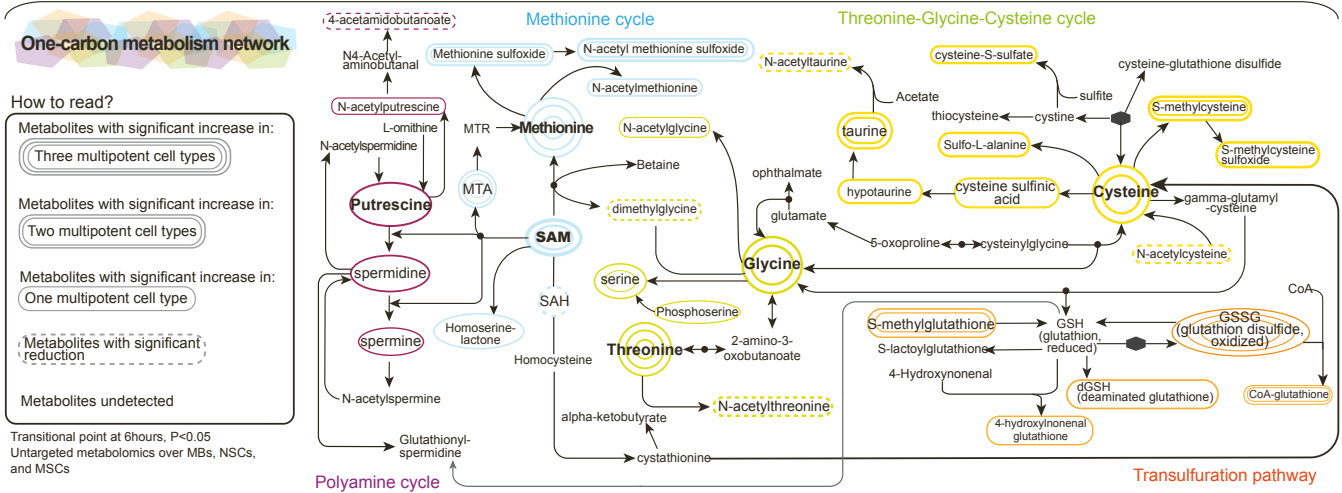

## B In pluripotent ESCs

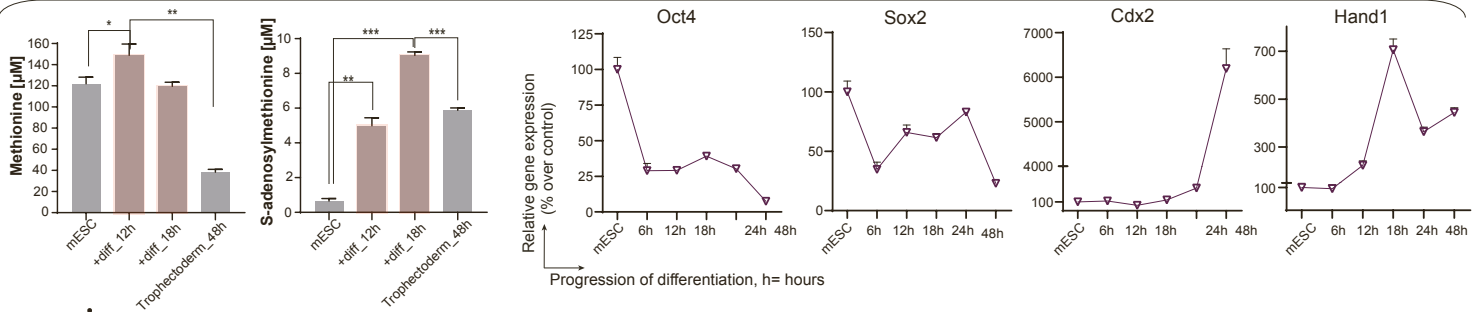

## C In pluripotent ESCs

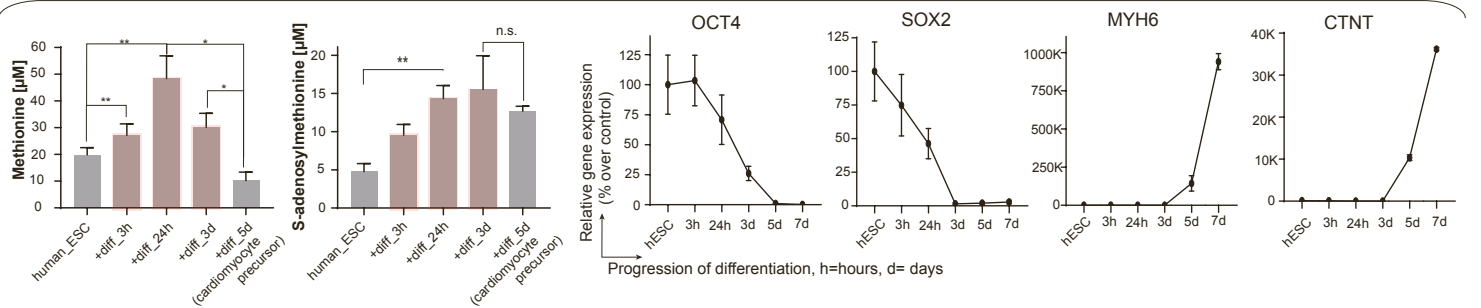

**Fig. S2. Common metabolites appear as a wave at the onset of cell identity changes of pluripotent and multipotent cells from mouse and human.**

(A) Representation of the increase identified in the relative levels of metabolites in three different cell populations derived from MBs, NSCs, and MSCs. Names circled represent metabolites that increase significantly at 6 hours after inducing their differentiation ( $P < 0.05$ ). One, two, or three circles denote significant increases in one, two, or the three cell types, respectively. Dotted circles enclose metabolites that only increase in one cell type, while the other two showed a negative trend. For specific characterization per cell type and times, see Tables S2-S4. Experiments shown are from  $n = 5$  replicates per cell type.

(B) Quantification of methionine and S-adenosylmethionine (SAM) levels in early states after inducing differentiation of human ESCs to cardiomyocytes;  $n = 3$  technical replicates, significantly different at  $*P < 0.05$ ,  $**P < 0.01$  (paired t-test). On the right side, as reference for the selection of times, the gene expression of 2-ESC-markers (OCT4 and SOX2) and 2-cardiomyocyte-markers (MYH6, CTNT) measured by rtPCR; where gene expression was normalized to the mean of GAPDH as housekeeping gene, and then normalized vs. control condition (time=0h). Represented the means  $\pm$  SEM,  $n = 3$ .

(C) Quantification of methionine and S-adenosylmethionine (SAM) levels in early states after inducing differentiation of mouse ESCs to trophoctoderm (cell line Zhbct4);  $n = 4$  technical replicates, significantly different at  $*P < 0.05$ ,  $**P < 0.01$  (paired t-test). On the right side, as reference for the selection of times, the gene expression of 2-ESC-markers (Oct4 and Sox2) and 2-trophectoderm-markers (Cdx2 and Hand1) measured by rtPCR; where gene expression was normalized to the mean of Nat1 as housekeeping gene, and then normalized vs. control condition (time=0h). Represented the means  $\pm$  SEM,  $n = 3$ .

Means  $\pm$  SEM, statistically different from controls at  $**P < 0.01$ ,  $***P < 0.001$ , and  $n \geq 3$ , where dots represent independent values. Related to Figure 1.

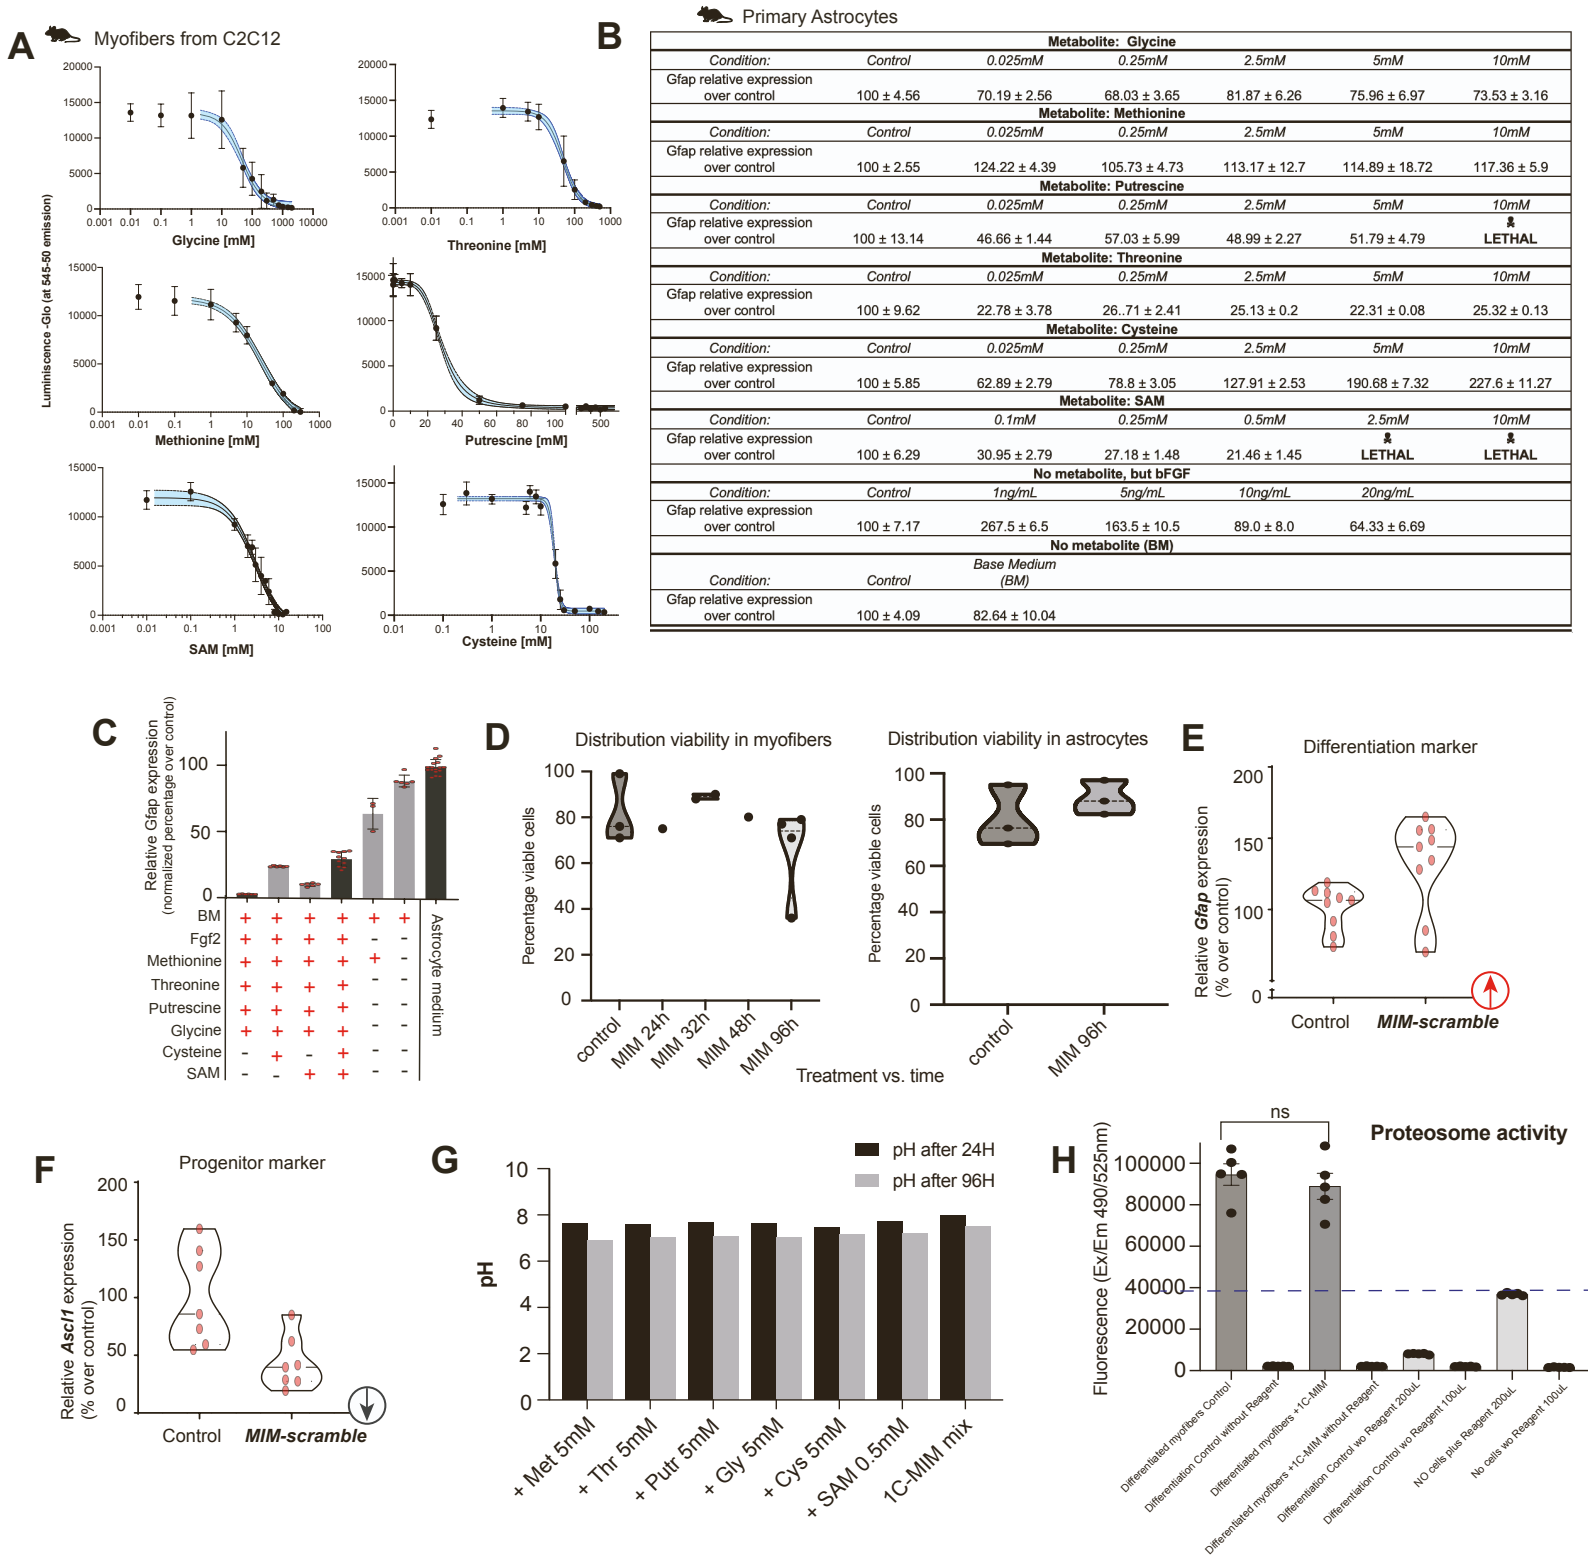

**Fig. S3. Standardizations on the supplementation with 1C-metabolites and phenotype changes on differentiated cells.**  
**(A)** Effect dose-response of individual metabolites over myofibers in vitro, where cell viability is evaluated by the relative quantification of ATP present by a luminescent assay, as an indicator of metabolically active cells.  
**(B)** Effect dose-response over the astrocytic phenotype evaluated by levels of expression of the glial marker GFAP; the expression was normalized with the geometric mean of at least two housekeeping genes (from Actb, Gapdh, and Nat1) and then normalized vs. control condition. Dots represent each value ( $n \geq 5$ ), and bars the mean  $\pm$  SEM.  
**(C)** Comparison of 1C-MIM6 versus the elimination of SAM (component lethal at high concentrations) and (or) cysteine (component with higher susceptibility to oxidation), see details in methods. The cocktail without SAM and without cysteine represents the 1C-MIM4 with 4-metabolites. Standardizations were done in mouse astrocytes. Note that the combination without SAM or cysteine achieved more inhibition of the Gfap-marker; thus, both combinations were tested, as seem to be dependent on the cell type.  
**(D)** Quantification of viable cells by trypan blue exclusion on myofibers (left panel) and astrocytes (right panel).  
**(E)** Evaluation of the effect of a scrambled mixture of metabolites not related to 1C-metabolism. This includes arginine, creatine, fructose, histidine, leucine, and valine; metabolites were added at 5mM (i.e., with similar concentrations than 1C-MIM). Note that scramble-cocktail did not lower Gfap-differentiation-marker neither potentiated the Asc1l-progenitor marker (opposite effect to the observed with 1C-MIM).  
**(G)** pH measurements of myoblast in culture in the presence of indicated metabolites (individually or in combination) for 24 or 96 hours.  
**(H)** Relative levels of proteasome activation in myofiber cultures supplemented with 1C-MIM, where differences compared with control are significant at  $**P < 0.001$  or  $***P < 0.0001$ ).  
Dots represent each value ( $n \geq 5$ ), and bars the mean  $\pm$  SEM. Related to Figure 2.



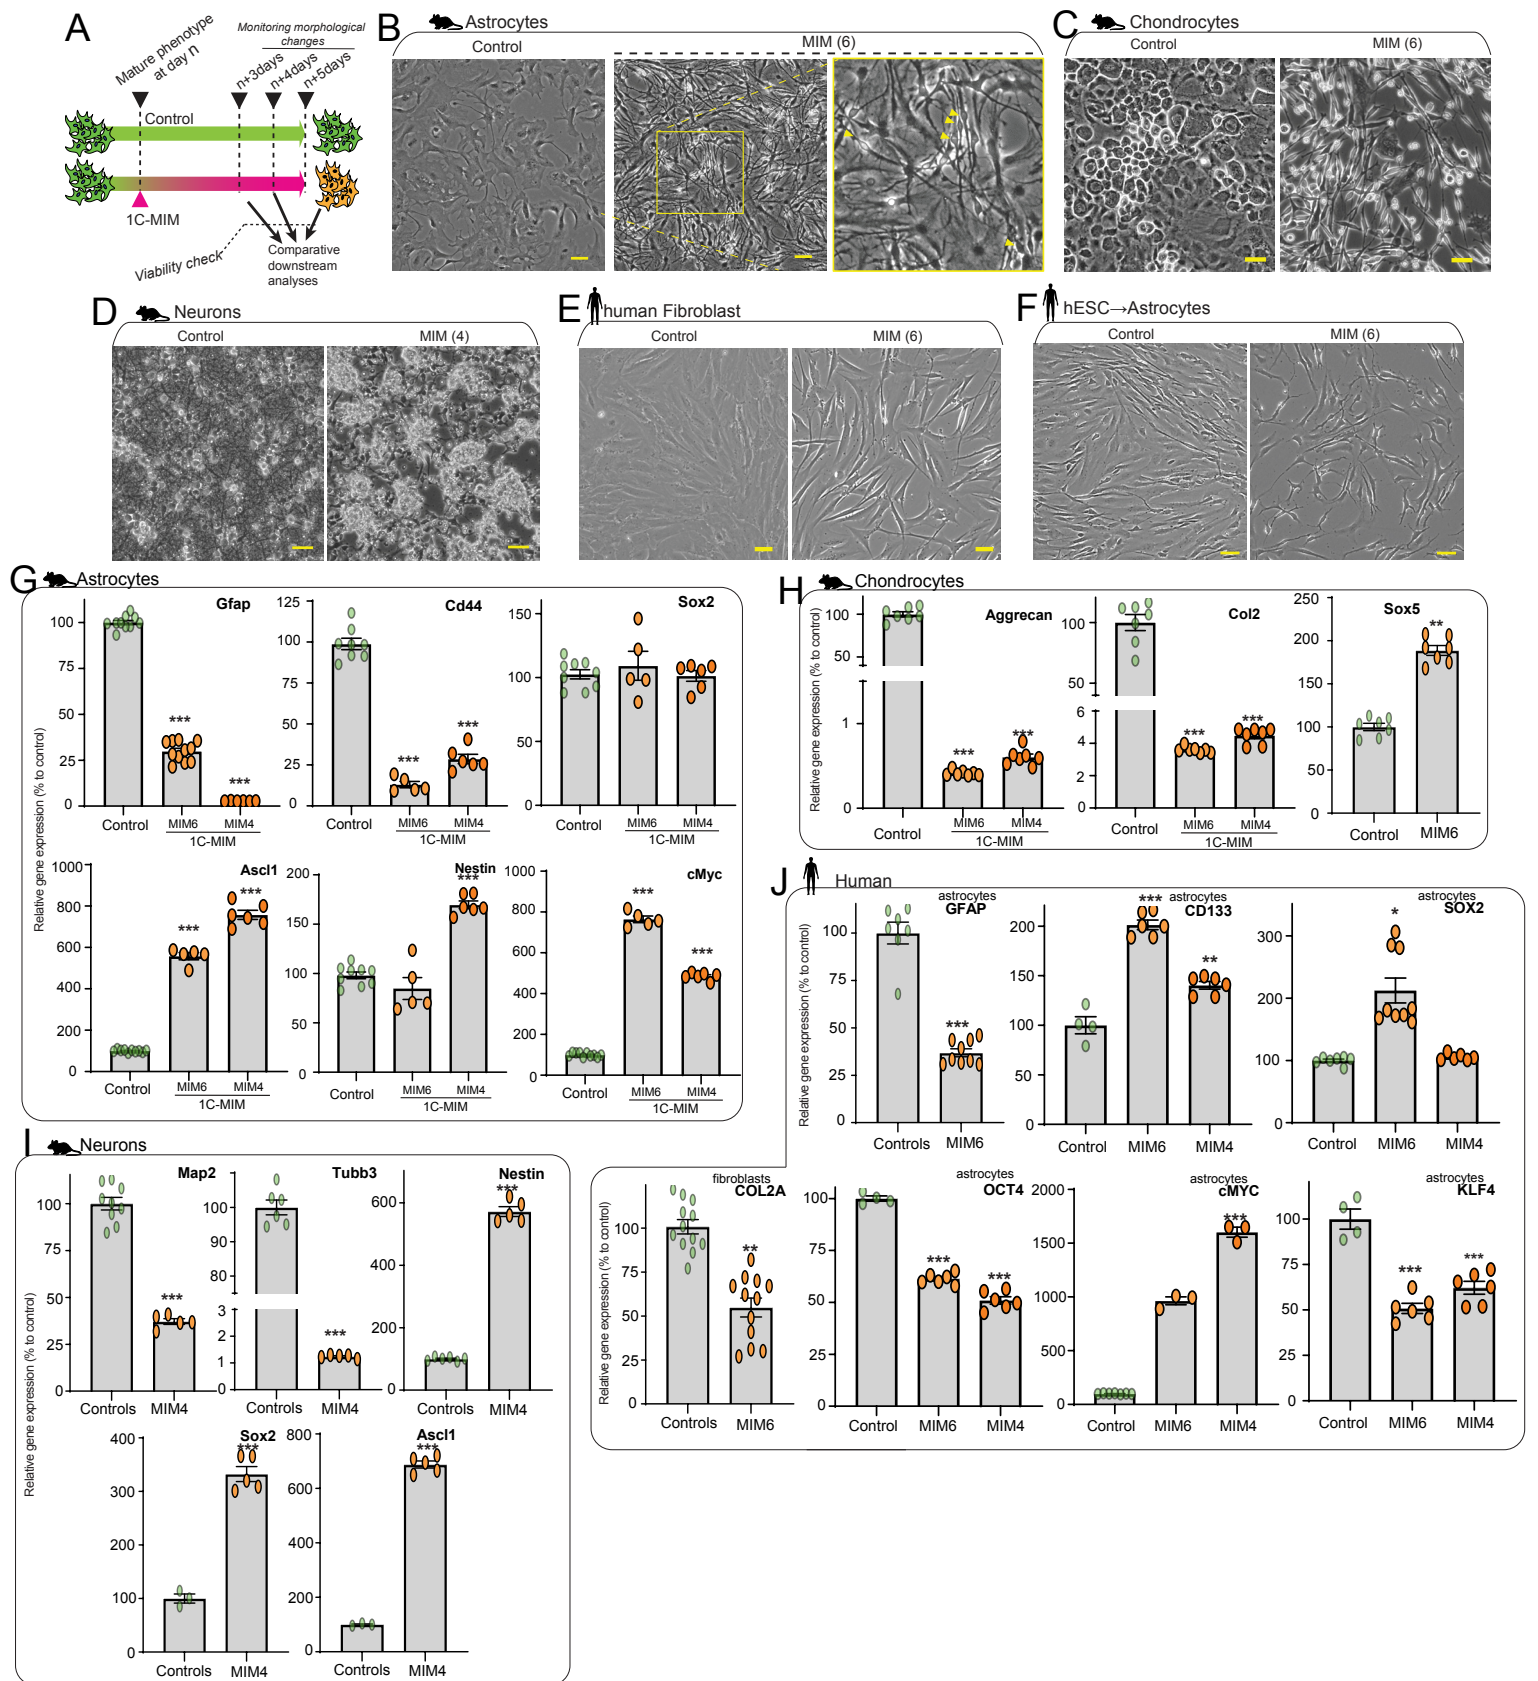

**Fig. S4. Basic gene marker screening on differentiated cells treated with 1C-MIM.**

(A) Experimental setup for supplementation: cells cultured from the same batch are maintained for the time necessary to express mature markers under a differentiation condition (according to each lineage, mature markers expression differs on time, represented in the schema as 'n'). Then cell populations of the same batch are separated and exposed to a control or 1C-MIM-supplemented medium with feeding every other day. MIM6 contains Methionine, Glycine, Putrescine, Cysteine, S-adenosylmethionine; while MIM4 is the former composition minus Cysteine and S-adenosylmethionine. The time for collection was determined in each cell type by observing changes in morphology. For mouse neural-related cells, samples were collected after 4 days of supplementation, for chondrocytes and fibroblasts after 5 days. Note: only muscle cells were collected after 3 days of supplementation (images not presented here, but in the main figure 2). The cell viability was determined at the time of collection as detailed in the Star Methods, and then samples were used for downstream analysis as required.

(B-F) Bright-field representative images of cultures of mouse astrocytes, chondrocytes, neurons; and human fibroblasts and astrocytes. Scale bar 50 $\mu$ m. The yellow square in (B) reflects the digital zoom observed in the image located to the right, for details on morphology.

(G-J) Representative markers were measured by qRT-PCR in the indicated cell types. The gene expression of genes of interest was normalized with the geometric mean of at least two housekeeping genes (from Actb, Gapdh, and Nat1) and then normalized vs. control conditions. Each dot represents an independent sample (n > 3), where differences compared with control are significant at \*P<0.05, \*\*P<0.005, \*\*\*P<0.001. Related to Figures 2, 3.

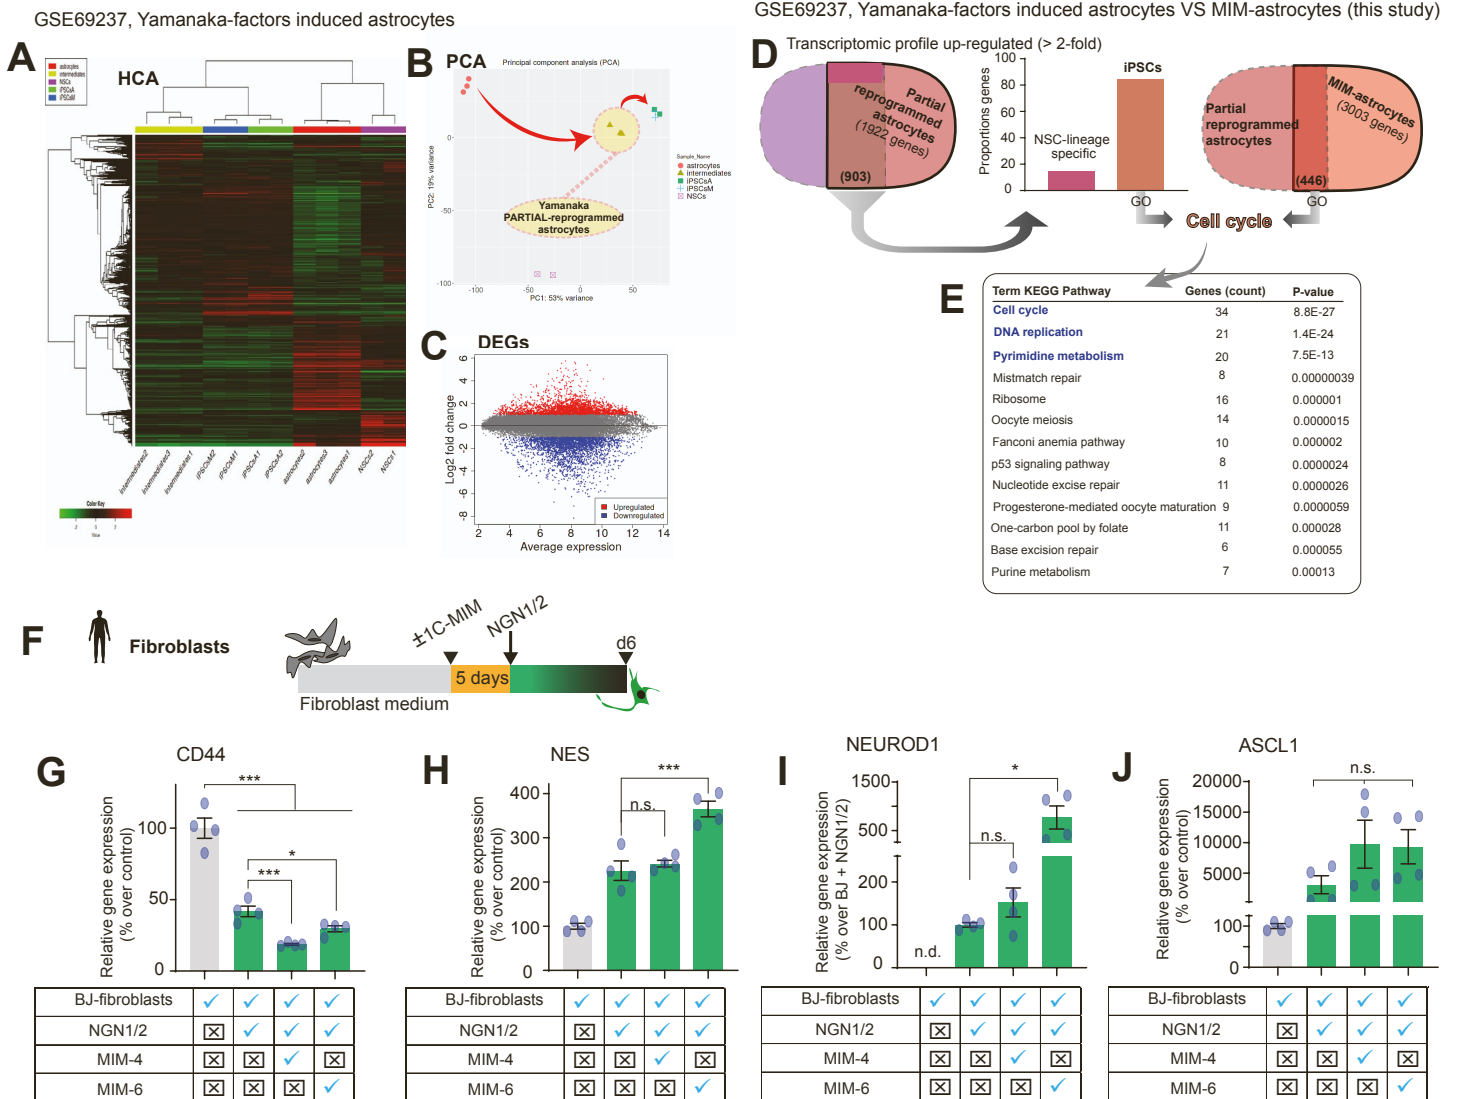

**Fig. S5. Orthogonal readouts in astrocytes and fibroblasts corroborate the facilitation of identity transitions by 1C-MIM supplementation in vitro.**

(A-E) 1C-MIM supplementation induced an intermediate like-progenitor state by regulating cell cycle in astrocytes. In (A) HCA, in (B) PCA, and in (C) volcano plot of DEG. Euclidean distance of RNAseq from astrocytes and intermediate reprogrammed cells (by canonical Yamanaka factors) compared with NSCs and iPSC as reference. The former available database GSE69237 was used to generate these representations. In (D) comparison between that former data (GSE69237) and the MIM-astrocytes of this study: where, Venn diagrams show the intersection of the transcriptomic profiles of the indicated populations; and the bars in between represent quantity and type of genes identified in the intersections. Of note 446 genes are shared between partial-reprogrammed and MIM astrocytes; particularly, those genes belong to iPSC-reprogrammed marks and are functionally enriched by Gene Ontology to a cell cycle function as shown in (E).

(F-J) Functional assay for the transdifferentiation of human BJ-fibroblasts into neuron-like cells enhanced by 1C-MIM. Schematic representation of the pre-treatment with 1C-MIM before the induction of Neurogenin 1+2 (NGN1/2) in (F). Relative expression of genes for fibroblast-identity in (G) and neuron-identity in (H-J). The expression was normalized with the mean of the housekeeping gene CTCF, then normalized vs. control condition BJ-fibroblasts; except in (I) where NEUROD1 was not detected in fibroblasts and the conditions with MIM were normalized vs. BJ-fibroblast + NGN1/2. Blue dots represent each value  $\pm$  SEM. Significantly differences at \* $P < 0.05$ , \*\* $P < 0.005$ , \*\*\* $P < 0.0001$ . Related to Figure 3.

**A****TOTAL mice used in this study 87**

| Distribution summary                                 | Control-untreated | 1C-MIM-intervention | 1C-MIM-intervention-short_term + HIGHdose | Glycine-intervention | Scramble-intervention |
|------------------------------------------------------|-------------------|---------------------|-------------------------------------------|----------------------|-----------------------|
|                                                      | 37                | 30                  | 12                                        | 4                    | 4                     |
| <b>ROUND 1</b>                                       |                   |                     |                                           |                      |                       |
| Intervention started at age of 6 weeks-old           |                   |                     |                                           |                      |                       |
| Intervention finished at age of 17.5 weeks-old       |                   |                     |                                           |                      |                       |
| Conditions (MALES strain ICR-CD1)                    |                   |                     |                                           |                      |                       |
| Control-untreated                                    | 4                 | 5                   |                                           |                      |                       |
| <b>ROUND 2</b>                                       |                   |                     |                                           |                      |                       |
| Intervention started at age of 9 weeks-old           |                   |                     |                                           |                      |                       |
| Intervention finished at age of 22.5 weeks-old       |                   |                     |                                           |                      |                       |
| Conditions (FEMALES, strain ICR-CD1)                 |                   |                     |                                           |                      |                       |
| Control-untreated                                    | 3                 | 5                   |                                           |                      |                       |
| <b>ROUND 3</b>                                       |                   |                     |                                           |                      |                       |
| Intervention started at age of 10 weeks-old          |                   |                     |                                           |                      |                       |
| Intervention finished at age of 14.5 weeks-old       |                   |                     |                                           |                      |                       |
| Conditions (Both Genres, strain ICR-CD1)             |                   |                     |                                           |                      |                       |
| Control-untreated                                    | 3                 |                     | Short term +High Dose                     |                      |                       |
| #mice per condition (females):                       | 3                 |                     | 3                                         |                      |                       |
| #mice per condition (males):                         | 3                 |                     | 4                                         |                      |                       |
| <b>ROUND 4</b>                                       |                   |                     |                                           |                      |                       |
| Intervention started at age of 9 weeks-old           |                   |                     |                                           |                      |                       |
| Intervention finished at age of 15 weeks-old         |                   |                     |                                           |                      |                       |
| Conditions (MALES, strain ICR-CD1)                   |                   |                     |                                           |                      |                       |
| Control-untreated                                    | 10                | 5                   | Short term +High Dose                     |                      |                       |
| #mice per condition:                                 | 10                | 5                   | 5                                         |                      |                       |
| #mice <u>without injury</u> per condition:           | 3                 | 4                   |                                           |                      |                       |
| <b>ROUND 5</b>                                       |                   |                     |                                           |                      |                       |
| Intervention started at age of 9 weeks-old           |                   |                     |                                           |                      |                       |
| Intervention finished at age of 22.5 weeks-old       |                   |                     |                                           |                      |                       |
| Conditions (MALES, strain C57BL/6J)                  |                   |                     |                                           |                      |                       |
| Control-untreated                                    | 4                 | 4                   |                                           | Gly_intervention     | Scr_intervention      |
| #mice per condition :                                | 4                 | 4                   |                                           | 4                    | 4                     |
| <b>ROUND 6</b>                                       |                   |                     |                                           |                      |                       |
| Intervention started at age of 72 weeks-old          |                   |                     |                                           |                      |                       |
| Intervention finished at age of 88.5 to 90 weeks-old |                   |                     |                                           |                      |                       |
| Conditions (MALES, strain C57BL/6J)                  |                   |                     |                                           |                      |                       |
| Control-untreated                                    | 3                 | 3                   |                                           |                      |                       |
| #mice per condition (ended at 88.5wo):               | 3                 | 3                   |                                           |                      |                       |
| #mice per condition (ended at 90wo):                 | 4                 | 4                   |                                           |                      |                       |

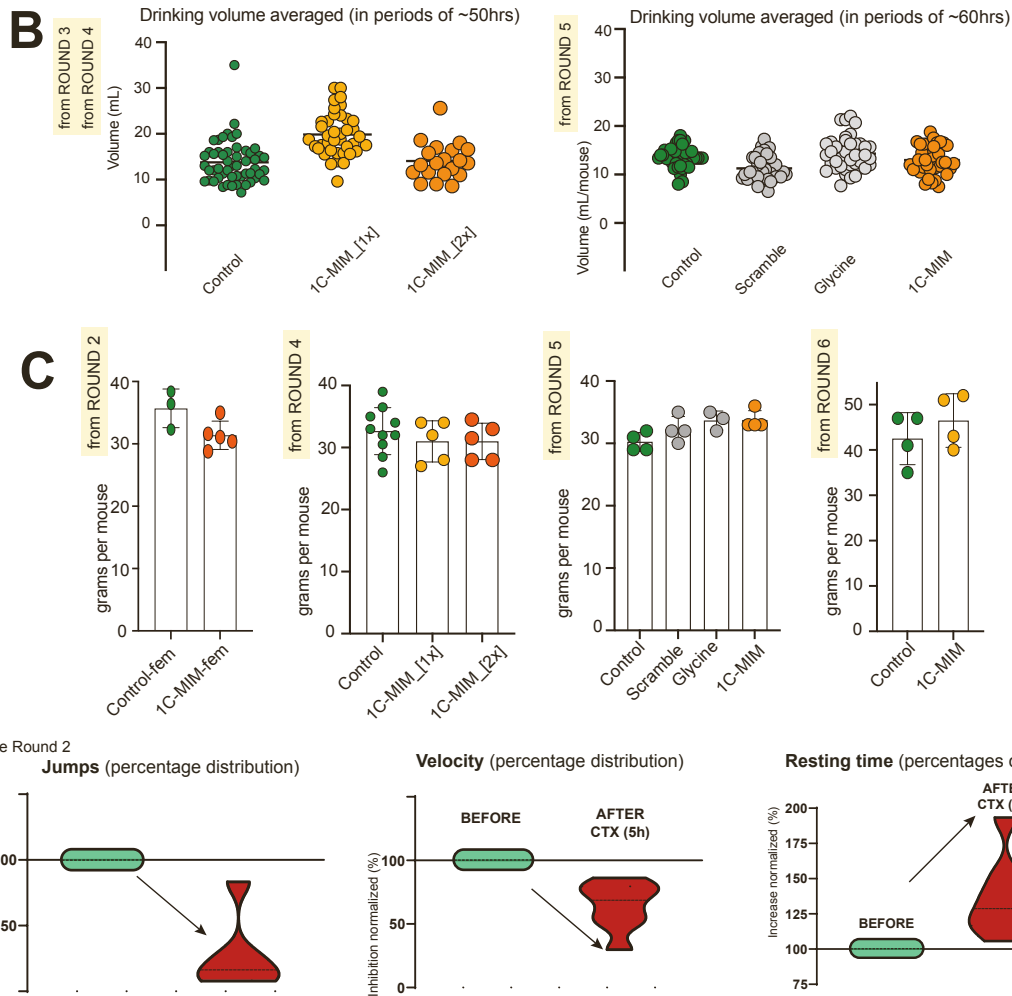**Fig. S6. Experimental design and immediate parameters evaluated for the in vivo intervention with 1C-MIM.**

(A) Distribution per round of the 87 mice used in the study. Each round represents the experimental intervention used for the study. Only two mice including control and 1C-MIM treated exhibited tumors, and only in the group of aged animals (round 6), therefore no correlation of tumor emergence was associated with the intervention.

(B) Drinking volumes. The drinking supplementation was replaced every other day with a standard volume, and measurements of consumption were taken during the intervention. The volumes were normalized according to the number of mice per cage.

(C), Bodyweight measurements after 1C-MIM drinking supplementation per round. Each dot represents one mouse.

(D) Movement impairment elicited after 5 hours of CTX injection evaluated in terms of jumps, velocity, and resting time. Measurements derived from the Open Field Test, recorded for a period of 60 minutes, graphs represent the distribution including control and 1C-MIM supplemented mice. Related to Figures 4, 5, 6.



Tibialis anterior damage after cardioxotin injury

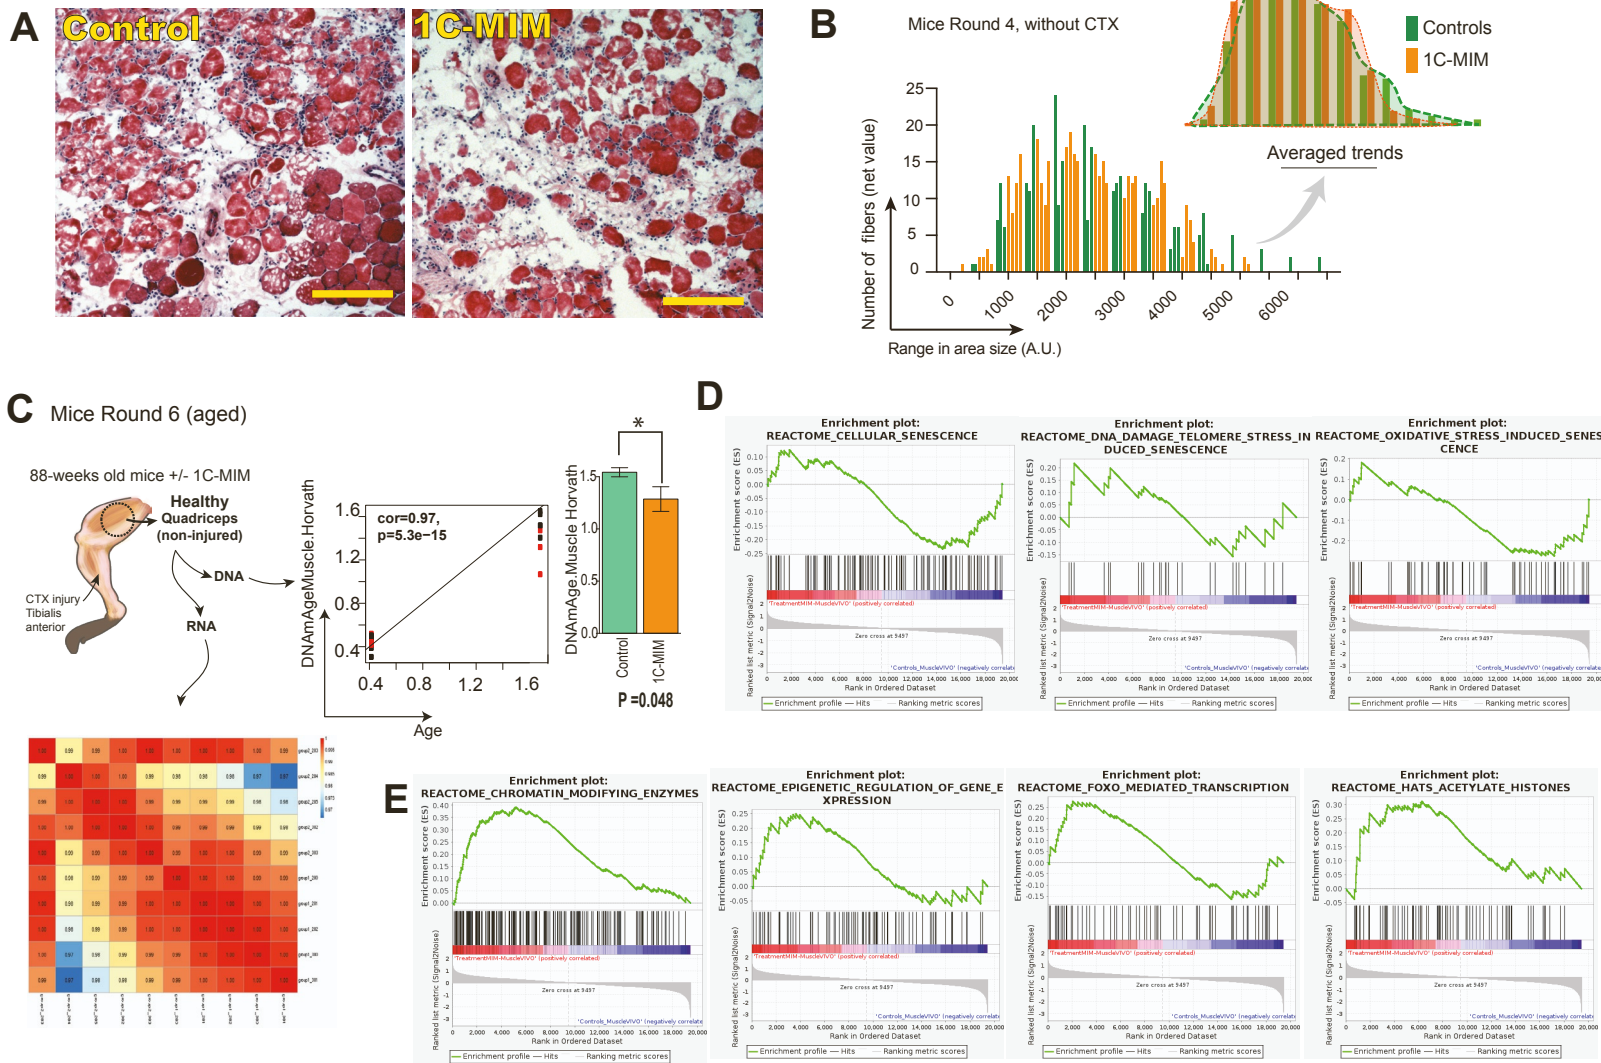

**Fig. S7. Analyses on the 1C-MIM intervention in muscle with and without CTX injury.**

(A) Representative histology images ~5 hours after CTX-injury showing similar damage in control and 1C-MIM supplemented mice. Tibialis anterior sections are stained by H&E (scale bar =250µm).

(B) Myofiber size distribution of centrally nucleated fibers without CTX injury of control and 1C-MIM supplemented mice. Insert to the right represents the average.

(C) DNA methylation clock using the Horvath Clock demonstrates rejuvenation after 1C-MIM supplementation in quadriceps non-injured. Left panel, schematic representation of how same samples were processed for transcriptomics and methylation, middle correlation analysis; and right panel, estimation of the methylation age using the Horvath clock for muscle. Tissues were recovered at 88-weeks old mice.

(D-E) Gene set enrichment analyses from transcriptomic analysis. See also Fig. 6A.



**Table S1. Identification of pathways relevant to the intermediate transition (bell pattern).** The below pathways represent the enrichments obtained by Metaboanalyst®. Source of the Venn diagram for the intermediate transition.

Experiments were from n=5 biological replicates.

Related to Figure 1G.

| <b>MBs, cluster4 (n=194)</b>                | <b>NSCs, cluster#3 (n=145)</b>              | <b>MSCs, cluster#1 (n=71)</b>                 |
|---------------------------------------------|---------------------------------------------|-----------------------------------------------|
| Glycine and Serine Metabolism               | Methionine Metabolism                       | Phosphatidylcholine Biosynthesis              |
| Carnitine Synthesis                         | Methylhistidine Metabolism                  | Spermidine and Spermine Biosynthesis          |
| Urea Cycle                                  | Spermidine and Spermine Biosynthesis        | Aspartate Metabolism                          |
| Glucose-Alanine Cycle                       | Homocysteine Degradation                    | Taurine and Hypotaurine Metabolism            |
| Nucleotide Sugars Metabolism                | Betaine Metabolism                          | Phosphatidylethanolamine Biosynthesis         |
| Betaine Metabolism                          | Taurine and Hypotaurine Metabolism          | Phospholipid Biosynthesis                     |
| Arginine and Proline Metabolism             | Glycine and Serine Metabolism               | Arginine and Proline Metabolism               |
| De Novo Triacylglycerol Biosynthesis        | Purine Metabolism                           | Methylhistidine Metabolism                    |
| Glutamate Metabolism                        | Sphingolipid Metabolism                     | Carnitine Synthesis                           |
| Ammonia Recycling                           | Valine, Leucine and Isoleucine Degradation  | Methionine Metabolism                         |
| Malate-Aspartate Shuttle                    | Glutathione Metabolism                      | Glycolysis                                    |
| Cardiolipin Biosynthesis                    | Pantothenate and CoA Biosynthesis           | Plasmalogen Synthesis                         |
| Plasmalogen Synthesis                       | Glutamate Metabolism                        | Urea Cycle                                    |
| Methionine Metabolism                       | Carnitine Synthesis                         | Warburg Effect                                |
| Galactose Metabolism                        | Arginine and Proline Metabolism             | Gluconeogenesis                               |
| Ketone Body Metabolism                      | Cysteine Metabolism                         | Glycine and Serine Metabolism                 |
| Glutathione Metabolism                      | Phosphatidylethanolamine Biosynthesis       | Sphingolipid Metabolism                       |
| Transfer of Acetyl Groups into Mitochondria | Histidine Metabolism                        | Beta Oxidation of Very Long Chain Fatty Acids |
| Phosphatidylcholine Biosynthesis            | Selenoamino Acid Metabolism                 | Mitochondrial Electron Transport Chain        |
| Starch and Sucrose Metabolism               | Phosphatidylcholine Biosynthesis            | Catecholamine Biosynthesis                    |
| Citric Acid Cycle                           | Ammonia Recycling                           | Vitamin B6 Metabolism                         |
| Beta-Alanine Metabolism                     | Beta-Alanine Metabolism                     | Ubiquinone Biosynthesis                       |
| Glycerolipid Metabolism                     | Alanine Metabolism                          | Purine Metabolism                             |
| Glycolysis                                  | Phosphatidylinositol Phosphate Metabolism   | Glutathione Metabolism                        |
| Aspartate Metabolism                        | Aspartate Metabolism                        | Betaine Metabolism                            |
| Gluconeogenesis                             | Nicotinate and Nicotinamide Metabolism      | Glutamate Metabolism                          |
| Alanine Metabolism                          | Nucleotide Sugars Metabolism                | Estrone Metabolism                            |
| Cysteine Metabolism                         | Catecholamine Biosynthesis                  | Glycerolipid Metabolism                       |
| Homocysteine Degradation                    | Vitamin B6 Metabolism                       | Oxidation of Branched Chain Fatty Acids       |
| Mitochondrial Beta-Oxidation of Short...    | Ubiquinone Biosynthesis                     | Mitochondrial Beta-Oxidation of Short...      |
| Warburg Effect                              | Lactose Synthesis                           | Phenylalanine and Tyrosine Metabolism         |
| Mitochondrial Beta-Oxidation of Long...     | Pyrimidine Metabolism                       | Mitochondrial Beta-Oxidation of Long...       |
| Pyruvate Metabolism                         | Transfer of Acetyl Groups into Mitochondria | Starch and Sucrose Metabolism                 |
| Pyruvaldehyde Degradation                   | Estrone Metabolism                          | Ammonia Recycling                             |
| Butyrate Metabolism                         | Urea Cycle                                  | Citric Acid Cycle                             |
| Mitochondrial Electron Transport Chain      | Lysine Degradation                          | Fructose and Mannose Degradation              |
| Ethanol Degradation                         | Citric Acid Cycle                           | Amino Sugar Metabolism                        |
| Phospholipid Biosynthesis                   | Fatty Acid Biosynthesis                     | Nicotinate and Nicotinamide Metabolism        |
| Threonine and 2-Oxobutanoate Degradation    | Galactose Metabolism                        | Tyrosine Metabolism                           |
| Glycerol Phosphate Shuttle                  | Porphyryn Metabolism                        | Galactose Metabolism                          |
| Taurine and Hypotaurine Metabolism          | Propanoate Metabolism                       | Histidine Metabolism                          |
| Inositol Metabolism                         | Pyruvate Metabolism                         | Fatty acid Metabolism                         |
| Methylhistidine Metabolism                  | Warburg Effect                              | Pyruvate Metabolism                           |
| Caffeine Metabolism                         | Tryptophan Metabolism                       | Tryptophan Metabolism                         |
| Estrone Metabolism                          | Bile Acid Biosynthesis                      | Bile Acid Biosynthesis                        |
| Nicotinate and Nicotinamide Metabolism      | Tyrosine Metabolism                         | Arachidonic Acid Metabolism                   |
| Phytanic Acid Peroxisomal Oxidation         |                                             |                                               |
| Inositol Phosphate Metabolism               |                                             |                                               |
| Mitochondrial Beta-Oxidation of Medium...   |                                             |                                               |
| Purine Metabolism                           |                                             |                                               |

**Table S2. Identification of trends of one-carbon metabolites during the intermediate stage between steady-state of Myoblasts (MBs) and early transitional-states of differentiated counterparts.** Statistical trends in the relative abundance of individual metabolites at the indicated times. Times selected by their potential overlap with the earliest/immediate transcriptional changes derived from the induction of differentiation. Experiments were from n=5 biological replicates.

Related to Figure 1 and descriptive of Supplemental figure 1D.

| <b>PATHWAYS</b>                         | <b>Comparisons</b>                  | <b>Comparison of MBs vs 6 hours of differentiation</b>                                                                                                                                   | <b>Comparison of MBs vs 12 hours of differentiation</b>                                                                                                           | <b>Comparison of MBs at 12 hours of differentiation vs 96 hours differentiation</b>                                                                      |
|-----------------------------------------|-------------------------------------|------------------------------------------------------------------------------------------------------------------------------------------------------------------------------------------|-------------------------------------------------------------------------------------------------------------------------------------------------------------------|----------------------------------------------------------------------------------------------------------------------------------------------------------|
| <b><u>Methionine-SAM Metabolism</u></b> | Significant positive trend (p<0.05) | Cysteine, methionine, cysteine sulfinic acid.                                                                                                                                            | Cysteine, methionine, taurine, homocysteine, cysteine sulfinic acid.                                                                                              | Cysteine-sulfinic acid, SAH, cystine, methionine sulfoxide.                                                                                              |
|                                         | Positive trend (p<0.10)             | Not applicable.                                                                                                                                                                          | Not applicable.                                                                                                                                                   | Not applicable.                                                                                                                                          |
|                                         | Insignificant change (p>0.1)        | SAH, SAM, hypotaurine, N-acetylmethionine, taurine, cystine, homocysteine.                                                                                                               | SAH, SAM, cystine, N-acetylcysteine, N-acetylmethionine, N-formylmethionine.                                                                                      | S-methylcysteine, cysteine, S-methylmethionine, S-methylcysteine-sulfoxide, methionine sulfone.                                                          |
|                                         | Negative trend (p<0.10)             | N-acetylmethionine sulfoxide.                                                                                                                                                            | Hypotaurine, cystathionine.                                                                                                                                       | DMPTA, N-acetylmethionine.                                                                                                                               |
|                                         | Significant negative trend (p<0.05) | S-methylcysteine sulfoxide, S-methylmethionine, S-methylcysteine, DMPTA, methionine sulfone, methionine sulfoxide, cystathionine, N-formylmethionine, N-acetylcysteine, N-acetyltaurine. | S-methylcysteine sulfoxide, S-methylmethionine, S-methylcysteine, N-acetyltaurine, methionine sulfoxide, DMPTA, methionine sulfone, N-acetylmethionine sulfoxide. | Methionine, N-formylmethionine, SAM, N-acetylcysteine, hypotaurine, homocysteine, cystathionine, N-acetyltaurine, taurine, N-acetylmethionine-sulfoxide. |
| <b><u>Gly-Ser-Thr Metabolism</u></b>    | Significant positive trend (p<0.05) | Threonine, serine, phosphoserine.                                                                                                                                                        | Threonine, serine.                                                                                                                                                | Dimethylglycine.                                                                                                                                         |
|                                         | Positive trend (p<0.10)             | Not applicable.                                                                                                                                                                          | Phosphoserine.                                                                                                                                                    | Not applicable.                                                                                                                                          |
|                                         | Insignificant change (p>0.1)        | Glycine                                                                                                                                                                                  | N-acetylthreonine, glycine.                                                                                                                                       | Not applicable.                                                                                                                                          |
|                                         | Negative trend (p<0.10)             | Not applicable.                                                                                                                                                                          | Not applicable.                                                                                                                                                   | Not applicable.                                                                                                                                          |
|                                         | Significant negative trend (p<0.05) | Dimethylglycine, betaine, N-acetylserine, N-acetylthreonine.                                                                                                                             | Dimethylglycine, betaine, N-acetylserine.                                                                                                                         | Threonine, N-acetylserine, serine, betaine, glycine, phosphoserine, N-acetylthreonine.                                                                   |
| <b><u>Polyamine Metabolism</u></b>      | Significant positive trend (p<0.05) | MTA, spermine, spermidine.                                                                                                                                                               | MTA, spermine, spermidine.                                                                                                                                        | N-acetylputrescine, putrescine.                                                                                                                          |
|                                         | Positive trend (p<0.10)             | Not applicable.                                                                                                                                                                          | Not applicable.                                                                                                                                                   | Not applicable                                                                                                                                           |
|                                         | Insignificant change (p>0.1)        | Not applicable.                                                                                                                                                                          | N-acetylspermidine.                                                                                                                                               | A-acetamidobutanoate.                                                                                                                                    |
|                                         | Negative trend (p<0.10)             | Not applicable.                                                                                                                                                                          | Not applicable.                                                                                                                                                   | Not applicable.                                                                                                                                          |
|                                         | Significant negative trend (p<0.05) | 4-acetamidobutanoate, N-acetylspermidine, N-acetylputrescine, putrescine.                                                                                                                | N-acetyl isoputrescine, 4-acetamidobutanoate, N-acetylputrescine, putrescine.                                                                                     | N-acetyl-isoputrescine, spermine, spermidine, N-acetylspermidine, MTA.                                                                                   |
| <b><u>Glutathione Metabolism</u></b>    | Significant positive trend (p<0.05) | Cyclyc dGSH, GSNO, CoA-glutathione, GSSG, S-methylglutathione.                                                                                                                           | Cyclyc dGSH, GSH, S-nitrosoglutathione, S-methylglutathione, 4-hydroxy-nonanal-glutathione, GSSG,                                                                 | Cysteine-glutathione disulfide, 5-oxoproline.                                                                                                            |

|                                     |                                                                                                                           |                                                                                 |                                                                                                                                                                                  |
|-------------------------------------|---------------------------------------------------------------------------------------------------------------------------|---------------------------------------------------------------------------------|----------------------------------------------------------------------------------------------------------------------------------------------------------------------------------|
|                                     |                                                                                                                           | cysteinglycine, S-lactoylglutathione.                                           |                                                                                                                                                                                  |
| Positive trend (p<0.10)             | Not applicable.                                                                                                           | Not applicable.                                                                 | Not applicable.                                                                                                                                                                  |
| Insignificant change (p>0.1)        | Cysteine-glutathione disulfide, cysteinglycine, S-lactoylglutathione, 4-hydroxy-nonenal glutathione, glutathione reduced. | Dicarboxylethylglutathione, CoA-glutathione.                                    | CoA-glutathione, 2-hydroxybutyrate.                                                                                                                                              |
| Negative trend (p<0.10)             | Not applicable.                                                                                                           | Not applicable.                                                                 | Not applicable.                                                                                                                                                                  |
| Significant negative trend (p<0.05) | Ophthalmalate, 5-oxoproline, 2-hydroxybutyrate, dicarboxyethylglutathione.                                                | Ophthalmalate, 5-oxoproline, 2-hydroxybutyrate, cysteine-glutathione disulfide. | Ophthalmalate, cyclic dGSH, S-lactoylglutathione, dicarboxylethylglutathione, GSSG, GSNO, cysteinglycine, S-methylglutathione, 2-hydroxybutyrate, 4-hydroxy-nonenal-glutathione. |

**Table S3. Identification of trends of one-carbon metabolites during the intermediate stage between steady-state of Neural Stem Cells (NSCs) and early transitional-states of differentiated counterparts.** Statistical trends in the relative abundance of individual metabolites at the indicated times. Times selected by their potential overlap with the earliest/immediate transcriptional changes derived from the induction of differentiation. Experiments were from n=5 biological replicates.

Related to Figure 1 and descriptive of Supplemental figure 1E.

| <b>PATHWAYS</b>                         | <b>Comparisons</b>                  | <b>Comparison of NSCs vs 6 hours of differentiation</b>                                                                                                                                                       | <b>Comparison of NSCs vs 12 hours of differentiation</b>                                                                                                                                    | <b>Comparison of NSCs at 12 hours of differentiation vs 72 hours differentiation</b>                                           |
|-----------------------------------------|-------------------------------------|---------------------------------------------------------------------------------------------------------------------------------------------------------------------------------------------------------------|---------------------------------------------------------------------------------------------------------------------------------------------------------------------------------------------|--------------------------------------------------------------------------------------------------------------------------------|
| <b><u>Methionine-SAM Metabolism</u></b> | Significant positive trend (p<0.05) | SAM, cysteine, methionine, N-acetylcysteine, sulfo-L-alanine, N-acetylmethionine, S-methylcysteine, S-methylcysteine sulfoxide, taurine, N-acetyltaurine, methionine sulfoxide, N-acetylmethionine sulfoxide. | SAM, methionine, cysteine, N-acetylcysteine, N-acetyltaurine, taurine, sulfo-L-alanine, methionine sulfoxide, N-acetylmethionine sulfoxide, N-acetylmethionine, S-methylcysteine-sulfoxide. | SAH, cystathionine, N-acetyltaurine, S-methylcysteine, taurine, methionine sulfone.                                            |
|                                         | Positive trend (p<0.10)             | Not applicable.                                                                                                                                                                                               | S-methylcysteine.                                                                                                                                                                           | S-methylcysteine sulfoxide.                                                                                                    |
|                                         | Insignificant change (p>0.1)        | SAH, cysteine sulfinic acid.                                                                                                                                                                                  | SAH, cysteine sulfinic acid.                                                                                                                                                                | Methionine sulfoxide, methionine.                                                                                              |
|                                         | Negative trend (p<0.10)             | Not applicable.                                                                                                                                                                                               | Not applicable.                                                                                                                                                                             | Not applicable.                                                                                                                |
|                                         | Significant negative trend (p<0.05) | Cystathionine, hypotaurine, N-formylmethionine.                                                                                                                                                               | Cystathionine, hypotaurine, N-formylmethionine.                                                                                                                                             | N-formylmethionine, hypotaurine, cysteine, SAM, N-acetylcysteine, sulfo-L-alanine, N-acetylmethionine, cysteine sulfinic acid. |
| <b><u>Gly-Ser-Thr Metabolism</u></b>    | Significant positive trend (p<0.05) | Threonine, glycine, betaine, serine, dimethylglycine, homoserinelactone, N-acetylglycine.                                                                                                                     | Betaine, glycine, serine, dimethylglycine, homoserinelactone, N-acetylglycine.                                                                                                              | N-acetylserine, betaine, dimethylglycine, N-acetylglycine.                                                                     |
|                                         | Positive trend (p<0.10)             | N-acetylserine.                                                                                                                                                                                               | Not applicable.                                                                                                                                                                             | N-acetylthreonine.                                                                                                             |
|                                         | Insignificant change (p>0.1)        | Phosphothreonine.                                                                                                                                                                                             | Threonine, phosphothreonine, N-acetylserine.                                                                                                                                                | Threonine.                                                                                                                     |
|                                         | Negative trend (p<0.10)             | Not applicable.                                                                                                                                                                                               | Not applicable.                                                                                                                                                                             | Phosphothreonine.                                                                                                              |
|                                         | Significant negative trend (p<0.05) | N-acetylthreonine.                                                                                                                                                                                            | N-acetylthreonine.                                                                                                                                                                          | Glycine, serine, homoserinelactone.                                                                                            |
| <b><u>Polyamine Metabolism</u></b>      | Significant positive trend (p<0.05) | Putrescine, MTA, N-acetylputrescine, 4-acetamidobutanoate.                                                                                                                                                    | Putrescine, MTA, N-acetylputrescine, 4-acetamidobutanoate.                                                                                                                                  | 4-acetamidobutanoate.                                                                                                          |
|                                         | Positive trend (p<0.10)             | Not applicable.                                                                                                                                                                                               | Not applicable.                                                                                                                                                                             | Not applicable.                                                                                                                |
|                                         | Insignificant change (p>0.1)        | N-acetylspermidine, N-diacetylspermine.                                                                                                                                                                       | N-acetylspermidine, N-diacetylspermine.                                                                                                                                                     | N-acetylspermidine.                                                                                                            |
|                                         | Negative trend (p<0.10)             | Not applicable.                                                                                                                                                                                               | Not applicable.                                                                                                                                                                             | Not applicable.                                                                                                                |



|                                      |                                     |                                                                               |                                                                               |                                                                      |
|--------------------------------------|-------------------------------------|-------------------------------------------------------------------------------|-------------------------------------------------------------------------------|----------------------------------------------------------------------|
|                                      | Significant negative trend (p<0.05) | Spermidine.                                                                   | Spermidine.                                                                   | Putrescine, spermidine, MTA, M-acetylputrescine, N-diacetylspermine. |
| <b><u>Glutathione Metabolism</u></b> | Significant positive trend (p<0.05) | 2-hydroxybutyrate, GSSG, cysteine-glutathine disulfide, ophthalmalate.        | 2-hydroxybutyrate, GSSG, ophthalmalate, cysteine-glutathione disulfide.       | 2-hydroxybutyrate, 5-oxoproline, 4-hydroxynonenal-glutathione.       |
|                                      | Positive trend (p<0.10)             | Not applicable.                                                               | Not applicable.                                                               | Not applicable.                                                      |
|                                      | Insignificant change (p>0.1)        | 4-hydroxy-nonenal glutathione.                                                | 4-hydroxy-nonenal-glutathione.                                                | Cysteine-glutathione disulfide, cysteinglycine.                      |
|                                      | Negative trend (p<0.10)             | Not applicable.                                                               | Not applicable.                                                               | Not applicable.                                                      |
|                                      | Significant negative trend (p<0.05) | GSH, S-lactoylglutathione, S-methylglutathione, cysteinglycine, 5-oxoproline. | S-lactoylglutathione, S-methylglutathione, 5-oxoproline, GSH, cysteinglycine. | S-lactoylglutathione, GSSG, S-methylglutathione, GSH, ophthalmalate. |

**Table S4. Identification of trends of one-carbon metabolites during the intermediate stage between steady-state of Mesenchymal Stem Cells (MSCs) and early transitional-states of differentiated counterparts.** Statistical trends in the relative abundance of individual metabolites at the indicated times. Times selected by their potential overlap with the earliest/immediate transcriptional changes derived from the induction of differentiation. Experiments were from n=5 biological replicates.

Related to Figure 1 and descriptive of Supplemental figure 1F.

| <b>PATHWAYS</b>                         | <b>Comparisons</b>                  | <b>Comparison of MSCs vs 6 hours of differentiation</b>                                                         | <b>Comparison of MSCs vs 24 hours of differentiation</b>                                                              | <b>Comparison of MSCs at 24 hours of differentiation vs 96 hours differentiation</b>                                |
|-----------------------------------------|-------------------------------------|-----------------------------------------------------------------------------------------------------------------|-----------------------------------------------------------------------------------------------------------------------|---------------------------------------------------------------------------------------------------------------------|
| <b><u>Methionine-SAM Metabolism</u></b> | Significant positive trend (p<0.05) | Methionine, cysteine s-sulfate, SAM, taurine, methionine sulfoxide, hypotaurine, N-acetylmethionine sulfoxide.  | Methionine, N-acetyltaurine, cystine, cysteine sulfonic acid, methionine sulfoxide.                                   | Cystine, cysteine s-sulfate, methionine sulfoxide.                                                                  |
|                                         | Positive trend (p<0.10)             | S-methylcysteine.                                                                                               | Cysteine s-sulfate.                                                                                                   | Not applicable.                                                                                                     |
|                                         | Insignificant change (p>0.1)        | SAH, cystine, cysteine sulfonic acid.                                                                           | SAM, cysteine, taurine, hypotaurine.                                                                                  | SAM, methionine, DMPTA, N-acetylmethionine sulfoxide, S-methylcysteine, cysteine sulfonic acid, N-formylmethionine. |
|                                         | Negative trend (p<0.10)             | Not applicable.                                                                                                 | N-formylmethionine.                                                                                                   | N-acetylmethionine.                                                                                                 |
|                                         | Significant negative trend (p<0.05) | N-acetylmethionine, N-acetylcysteine, methionine sulfone, cysteine, N-acetyltaurine, DMPTA, N-formylmethionine. | N-acetylmethionine, N-acetylcysteine, DMPTA, S-methylcysteine, methionine sulfone, SAH, N-acetylmethionine sulfoxide. | N-acetylcysteine, methionine sulfone, cysteine, SAH, taurine, N-acetyltaurine, hypotaurine.                         |
| <b><u>Gly-Ser-Thr Metabolism</u></b>    | Significant positive trend (p<0.05) | Threonine, N-acetylthreonine.                                                                                   | Threonine, N-acetylthreonine, glycine, serine, N-acetylserine.                                                        | N-acetylthreonine.                                                                                                  |
|                                         | Positive trend (p<0.10)             | Glycine, serine.                                                                                                | Not applicable.                                                                                                       | Not applicable.                                                                                                     |
|                                         | Insignificant change (p>0.1)        | N-acetylserine.                                                                                                 | Not applicable.                                                                                                       | Threonine, Serine.                                                                                                  |
|                                         | Negative trend (p<0.10)             | Not applicable.                                                                                                 | Not applicable.                                                                                                       | Not applicable.                                                                                                     |
|                                         | Significant negative trend (p<0.05) | Betaine, dimethylglycine.                                                                                       | Betaine, dimethylglycine.                                                                                             | Betaine, dimethylglycine, glycine, N-acetylserine.                                                                  |
| <b><u>Polyamine Metabolism</u></b>      | Significant positive trend (p<0.05) | MTA.                                                                                                            | Putrescine, N-acetylspermidine.                                                                                       | Not applicable.                                                                                                     |
|                                         | Positive trend (p<0.10)             | Not applicable.                                                                                                 | N-acetylputrescine.                                                                                                   | Not applicable.                                                                                                     |
|                                         | Insignificant change (p>0.1)        | N-acetylspermidine, N-acetylputrescine, putrescine, spermine, spermidine.                                       | Spermidine, Spermine.                                                                                                 | Spermine, N-acetylputrescine, 4-acetamidobutanoate.                                                                 |
|                                         | Negative trend (p<0.10)             | Not applicable.                                                                                                 | MTA.                                                                                                                  | Not applicable.                                                                                                     |
|                                         | Significant negative trend (p<0.05) | 4-acetamidobutanoate.                                                                                           | 4-acetamidobutanoate.                                                                                                 | Spermidine, N-acetylspermidine, MTA, putrescine.                                                                    |
| <b><u>Glutathione Metabolism</u></b>    | Significant positive trend (p<0.05) | CoA-glutathione, GSSG, 4-hydroxy-nonenal-glutathione, S-methylglutathione.                                      | Cysteine glutathione-disulfide.                                                                                       | 5-oxoproline.                                                                                                       |
|                                         | Positive trend (p<0.10)             | Dicarboxyethylglutathione, cysteine glutathione-disulfide.                                                      | Not applicable.                                                                                                       | Not applicable.                                                                                                     |
|                                         | Insignificant change (p>0.1)        | Cysteinglycine, GSH, S-lactoylglutathione, 3-dephospho-CoA-glutathione.                                         | Cysteinglycine, 5-oxoproline, S-lactoylglutathione.                                                                   | CoA-glutathione, 3-dephospho-CoA-glutathione, 4-hydroxy-nonenal-glutathione, S-                                     |

|                                     |                                              |                                                                                                                                                                         |                                                                          |
|-------------------------------------|----------------------------------------------|-------------------------------------------------------------------------------------------------------------------------------------------------------------------------|--------------------------------------------------------------------------|
|                                     |                                              |                                                                                                                                                                         | methylglutathione, GSH, S-lactoylglutathione, dicarboxyethylglutathione. |
| Negative trend (p<0.10)             | Not applicable.                              | Not applicable.                                                                                                                                                         | 2-hydroxybutyrate.                                                       |
| Significant negative trend (p<0.05) | Ophtalmate, 5-oxoproline, 2-hydroxybutyrate. | Ophtalmate, CoA-glutathione, S-methylglutathione, 2-hydroxybutyrate, dicarboxyethyl glutathione, GSH, GSSG, 4-hydroxy-nonenal-glutathione, 3-dephospho-CoA-glutathione. | Ophtalmate, cysteinglycine, cysteine glutathione-disulfide, GSSG.        |

**Table S5. Sequences of primers, where M for mouse, H for human.**  
Related to STAR Methods.

| Gene name              | Specie | Forward primer seq             | Revers primer seq              |
|------------------------|--------|--------------------------------|--------------------------------|
| Beta-Actin             | M      | CATTGCTGACAGGATGCAGAAGG        | TGCTGGAAGGTGGACAGTGAGG         |
| Gapdh                  | M      | CATCACTGCCACCCAGAAGACTG        | ATGCCAGTGAGCTTCCCGTTCA         |
| Nat1                   | M      | ATTCTTCGTTGTCAAGCCGCCAAAGTGGAG | AGTTGTTTGCTGCGGAGTTGTCATCTCGTC |
| RPL38                  | M      | AGGATGCCAAGTCTGTCAAGA          | TCCTTGTCTGTGATAACCAGG          |
| Ascl1                  | M      | CTCGTCTACTCCTCCGACG            | ATCTGCTGCCATCCTGCTTC           |
| Cd44                   | M      | ACAACCCTTCAGCCTACTGC           | CGCCGCTCTTAGTGCTAGAT           |
| Cd9                    | M      | CTGTGGCATAGCTGGTCTTTG          | AGACCTCACTGATGGCTTCAGG         |
| cMyc                   | M      | GTGCTGCATGAGGAGACACC           | GACCTCTTGGCAGGGGTTT            |
| Klf4                   | M      | GCACACCTGCCAACTCACAC           | CCGTCCCAGTCACAGTGGTAA          |
| Gfap                   | M      | AGGTTGAATCGTGGAGGAG            | GCTTGGCCACATCCATCTC            |
| Nes                    | M      | CCAGAGCTGGACTGGAATC            | ACCTGCCTCTTTTGGTTCT            |
| Cd133                  | M      | TCCCTCCTGTGCAGCAATCA           | CCAAACTTCTTCTGTTTCCCGA         |
| Sox2                   | M      | AACGGCAGCTACAGCATGATGC         | CGAGCTGGTCATGGAGTTGTAC         |
| Hes5                   | M      | CCGTCACTACCTGAAACACAG          | GGTCAGGAACTGTACCCGCTC          |
| Mtr                    | M      | GCTCTGTGAAGCCTCATCTGG          | GAGCCATTCTCCACTCATCTG          |
| Chrd1                  | M      | GTATGCAGAGGGGATGCAGAA          | TGGAGGATCGTAGGGGGAAC           |
| Odc1                   | M      | TGCCACACTCAAACCAGCAGG          | ACACTGCCTGAACGAAGGTCTC         |
| Beta-III-tubulin       | M      | ACCTATTCAGGCCCGACAACCTTA       | GCAGGCAGTCACAATTCTCACAC        |
| Map2                   | M      | CTGCGAGTAAGCTGTGACCG           | AGCTGAGGAACCTTAATTCTTGCC       |
| SB100                  | M      | GACTCCAGCAGCAAAGGTGA           | TGATTTCTCCAGGAAGTGAGAG         |
| Mat1a                  | M      | CCTTCTCTGAAAGGACTACACC         | GACAGAGTTCTGCCACACCAA          |
| Ascl1                  | M      | CGGAACTGATGCGCTGCAAACG         | GGCAAACCCAGGTTGACCAAC          |
| Sox5                   | M      | CGCCAGATGAAAGAGCACTCAG         | TGAGTCAGGCTCCTCAGTGTG          |
| Cd51                   | M      | GTGTGAGGAACTGGTCCGCTAT         | CCGTTCTCTGGTCCAACCGATA         |
| Thy1                   | M      | CCTTACCCTAGCCAACCTCAC          | TTATGCCGCCACACTTGACCAG         |
| Sox9                   | M      | GCAGACCAGTACCCGCATCT           | CTCGTTCAGCAGCCTCCAG            |
| Aggrecan               | M      | CCTGCTACTTCATCGACCCC           | AGATGCTGTTGACTCGAACCT          |
| Col2a                  | M      | AATGGGCAGAGGTATAAAGATAAGGA     | CATTCCCAGTGTCACACACACA         |
| Myf5                   | M      | GGTGGAGAACTATTACAGCCTGC        | ACAGTAGATGCTGTCAAAGCTGC        |
| Ccnd1                  | M      | GCAGAAGGAGATTGTGCCATCC         | AGGAAGCGGTCCAGGTAGTTCA         |
| Gdf6                   | M      | CACTAGCTTTGTAGACAGAGGAC        | CCTGGCGATAAAGCCTTAGCTC         |
| Myh11                  | M      | GCAACTACAGGCTGAGAGGAAG         | TCAGCCGTGACCTTCTCTAGCT         |
| Cldn2                  | M      | AGGACTTCTGCTGACATCCAG          | AATCCTGGCAGAACACGGTGCA         |
| Ckm                    | M      | GGCTTCACTCTGGACGATGTCA         | CCTTGAAGACCGTGTAGGACTC         |
| Mef2c                  | M      | GTGGTTTCCGTAGCAACTCCTAC        | GGCAGTGTGAAGCCAGACAGA          |
| Vimentin               | M      | CGGAAAGTGAATCCTTGCAGG          | AGCAGTGAGGTCAGGCTTGAA          |
| Glast                  | M      | GCGATTGGTCGCGGTGATAATG         | CGACAATGACTGTCACGGTGTAC        |
| Glutamine synthetase   | M      | CTGCCATACCAACTTCAGCACC         | CTGGTGCCTCTTGCTCAGTTT          |
| Myelin Binding Protein | M      | TCTGGCAAGGACTCACACAC           | AGGTGGTGTTCGAGGTGTCA           |
| O4                     | M      | TGTAACAGGTCTCGGAAGGG           | TGTGCAAGGACAGGTTGTGAC          |
| NSE                    | M      | TGGCAAGGATGCCACTAACGTG         | AACTCAGAGGCAGCCACATCCA         |
| Synaptophysin          | M      | TTGGCTTCGTGAAGGTGCTGCA         | ACTCTCCGTCTTGTGGCACAC          |
| CTCF                   | H      | GGGCTTGAGAGCTGGTCTATT          | CTTCGACTGCATCACCTTCCATT        |
| NESTIN                 | H      | GCACCTCAAGATGTCCCTCAGC         | GTTTGCAGCCGGGAGTTCTCA          |
| NEUROD1                | H      | TCACTGCTCAGGACCTACTAACACA      | GTCTGTCCAGCTTGAGGACCTT         |
| ASCL1                  | H      | CGACTTCAACCACTGGTCTGAG         | TAAAGATGCAGGTTGTCCGATCA        |
| CD44                   | H      | CCAGAAGGAACAGTGGTTTGGC         | ACTGTCCTCTGGGCTTGGTGT          |
| GUS B                  | H      | GGTTTACCAGGATCCACCTC           | ACTCTCGTCGGTACTGTTT            |
| GAPDH                  | H      | AATCCCATCACCATCTTCCA           | TGGACTCCACGACTACTCA            |
| SOX2                   | H      | CAAAAATGGCCATGCAGGTT           | AGTTGGGATCGAACAAGCTATT         |
| GFAP                   | H      | AGAGATCCGCACGCAGTATG           | GTAGTCGTTGGCTTCGTGCT           |
| cMYC                   | H      | GGATTCTCTGCTCTCCTCGAC          | AGACTCTGACCTTTTGCCAGG          |



**CONTINUE TABLE S5**

|        |   |                        |                        |
|--------|---|------------------------|------------------------|
| CD133  | H | CACTACCAAGGACAAGGCGTTC | CAACGCCTCTTTGGTCTCCTTG |
| OCT4   | H | CCTGAAGCAGAAGAGGATCACC | AAAGCGGCAGATGGTCGTTTGG |
| KLF4   | H | CATCTCAAGGCACACCTGCGAA | TCGGTCGCATTTTTGGCACTGG |
| NANOG  | H | AAATACCTCAGCCTCCAGCAG  | CCATTGCTATTCTTCGGCCAG  |
| COL1A2 | H | GGCCCTCAAGGTTTCCAAGG   | CACCCTGTGGTCCAACAACCTC |
